# Supplementary material for: Alginate Hydrogel-Embedded Capillary Sensor for Quantitative Immunoassay with Naked Eye
Source: MDPI journal article supplement (doi:10.3390/s20174831), 2020-08-27
Supplement: s1 [file s1]

# Supplementary Materials For:

## Alginate Hydrogel-Embedded Capillary Sensor for Quantitative Immunoassay with Naked Eye

Wenshu Zheng <sup>1,2,3,†</sup>, Cen Gao <sup>1,†</sup>, Liheng Shen <sup>1</sup>, Chang Qu <sup>1</sup>, Xuan Zhang <sup>1</sup>, Lu Yang <sup>1</sup>, Qiang Feng <sup>2,4</sup> and Rongbing Tang <sup>1,\*</sup>

<sup>1</sup> School of Stomatology, Lanzhou University, Lanzhou 730000, China; [wzheng5@tulane.edu](mailto:wzheng5@tulane.edu) (W.Z.); [gaoc15@lzu.edu.cn](mailto:gaoc15@lzu.edu.cn) (C.G.); [shenlh14@lzu.edu.cn](mailto:shenlh14@lzu.edu.cn) (L.S.); [quchang3313@mails.jlu.edu.cn](mailto:quchang3313@mails.jlu.edu.cn) (C.Q.); [xuanzhang18@lzu.edu.cn](mailto:xuanzhang18@lzu.edu.cn) (X.Z.); [yanglu19@lzu.edu.cn](mailto:yanglu19@lzu.edu.cn) (L.Y.)

<sup>2</sup> National Center for Nanoscience and Nanotechnology, University of Chinese Academy of Sciences, Beijing 100190, China; [qiang.feng@utsouthwestern.edu](mailto:qiang.feng@utsouthwestern.edu)

<sup>3</sup> School of Medicine, Tulane University, New Orleans, LA 70112, USA

<sup>4</sup> Department of Pharmacology Harold C. Simmons Comprehensive Cancer Center, University of Texas Southwestern Medical Center, TX 75390, USA

\* Correspondence: [tangrb@lzu.edu.cn](mailto:tangrb@lzu.edu.cn)

† These authors contributed equally to this work.

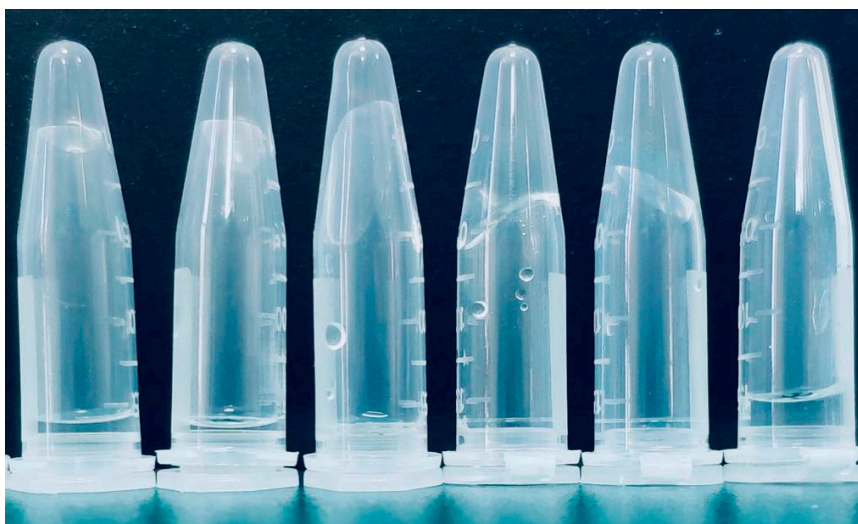

Figure S1. Photos of alginate hydrogel crosslinked with different concentration (from left to right 0.5 mM, 1 mM, 2 mM, 4 mM, 8 mM, 16 mM, 0) of  $\text{CuCl}_2$

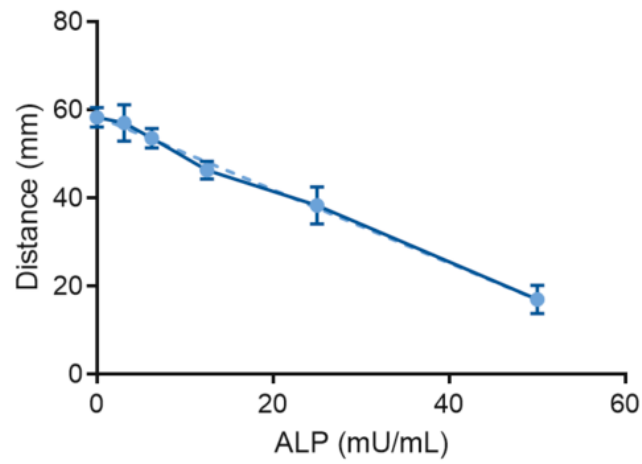

Figure S2. Linear response between the flow distance and the concentration of ALP using AHCS, mean $\pm$ SD, n=3

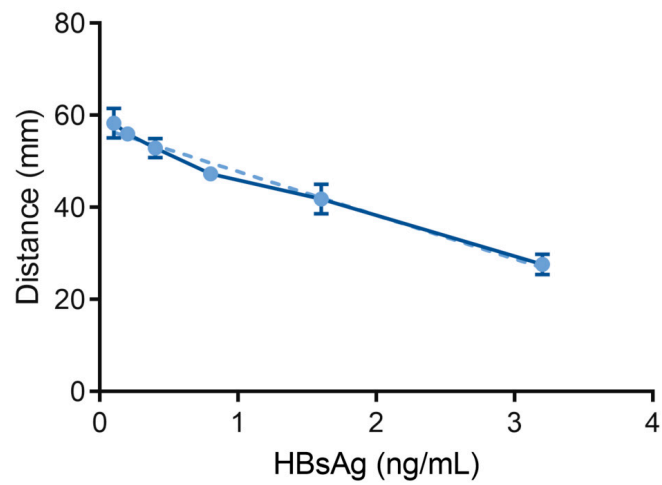

Figure S3. Linear response between the flow distance and the concentration of HBsAg using AHCS, mean $\pm$ SD, n=3

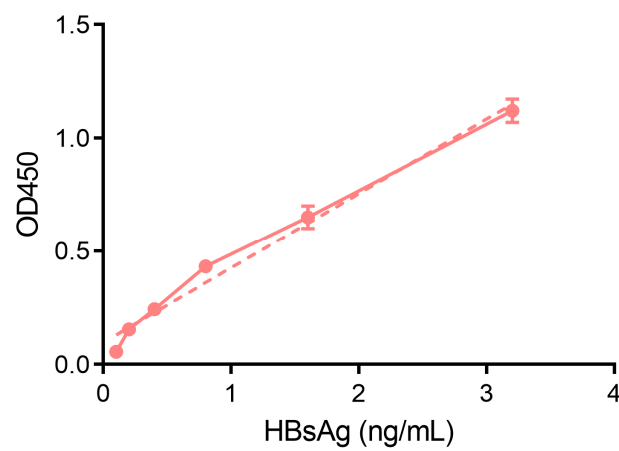

Figure S4. Linear response between the absorbance and the concentration of HBsAg using commercialized ELISA, mean $\pm$ SD, n=3
